# Supplementary material for: A new type of hybrid nanostructure: complete photo-generated carrier separation and ultrahigh photocatalytic activity
Source: Royal Society of Chemistry journal article supplement (doi:10.1039/c4ta02739f), 2014-01-01
Supplement: c4ta02739f1.pdf [file c4ta02739f1.pdf]

† **Electronic Supplementary Information (ESI) available**

**A new type of hybrid nanostructures: complete photo-generated  
carriers separation and ultrahigh photocatalytic activity**

Yaguang Li<sup>a,b</sup>, and Liping Zhu\*<sup>a,b</sup>, Yanmin Guo<sup>a,b</sup>, Hui Song<sup>a,b</sup>, Zirui

Lou<sup>a,b</sup>, Zhizhen Ye<sup>a,b</sup>

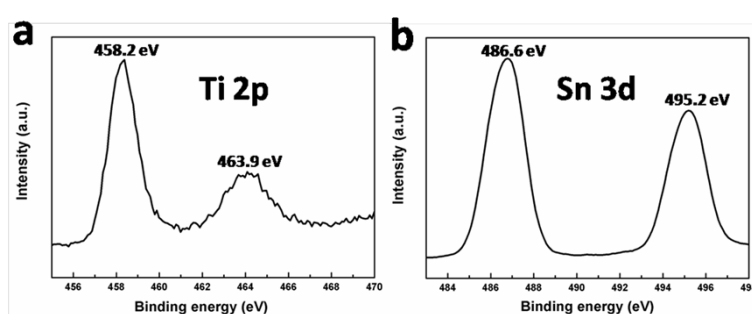

**Figure S1.** (a) and (b) are the XPS spectra for Ti2p, Sn3d of the pure TiO<sub>2</sub> and SnO<sub>2</sub> hollow spheres respectively.

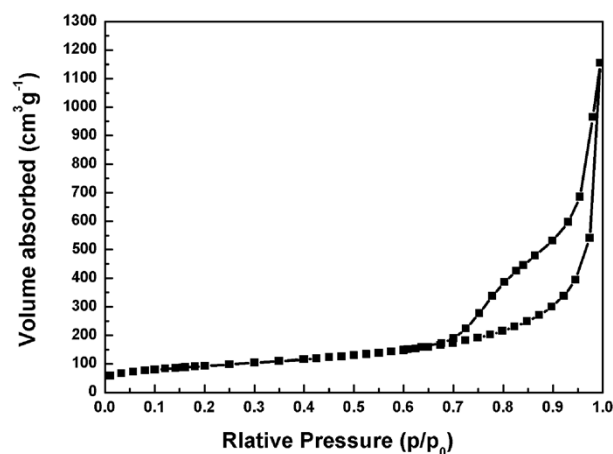

**Figure S2.** The nitrogen adsorption/desorption isotherms of TiO<sub>2</sub>/SnO<sub>2</sub> hybrid nanostructures.

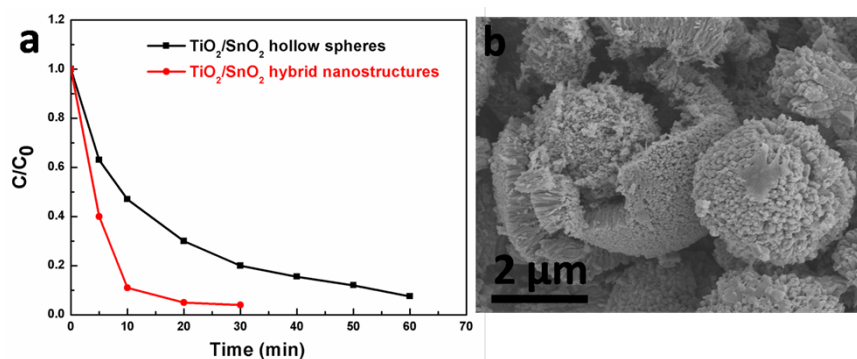

**Figure S3.** (a) The concentration changes of RhB dye as a function of irradiation time under full range light with our TiO<sub>2</sub>/SnO<sub>2</sub> nanostructures and the TiO<sub>2</sub>/SnO<sub>2</sub> hollow spheres reported by Huang et al<sup>21</sup>. (b) SEM image of the TiO<sub>2</sub>/SnO<sub>2</sub> hollow spheres reported by Huang et al<sup>21</sup>.

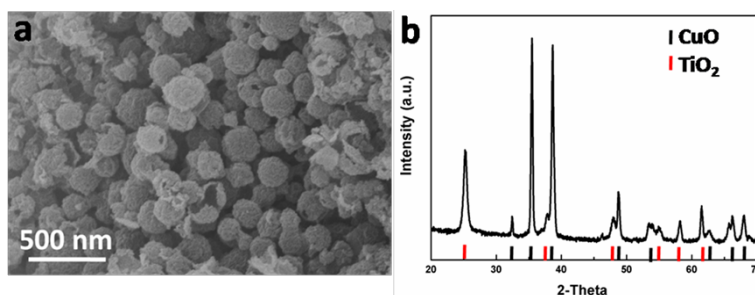

**Figure S4.** (a) and (b) are the SEM image and XRD pattern of the TiO<sub>2</sub>/CuO hollow spheres.

The typical SEM image of the TiO<sub>2</sub>/CuO hollow spheres was shown in Figure S4a. It clearly illustrated the perfect hollow spheres morphology of the TiO<sub>2</sub>/CuO. The XRD results of the TiO<sub>2</sub>/CuO hollow spheres in Figure S4b showed the pure TiO<sub>2</sub> (PDF#65-1119) and CuO (PDF#65-2309) diffraction peaks were coexisted in this chart.

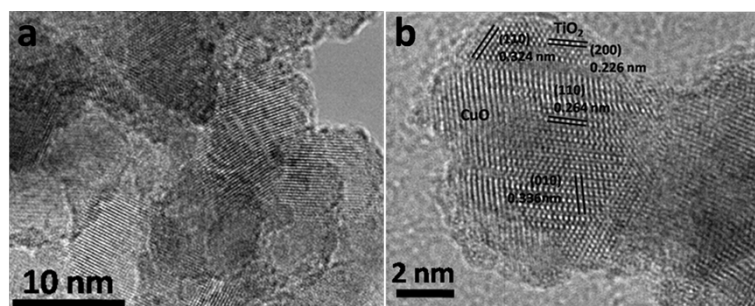

**Figure S5.** (a) is the enlarged TEM image of the shell of TiO<sub>2</sub>/CuO hollow spheres and (b) is the HRTEM image of the TiO<sub>2</sub>/CuO nanoheterojunctions.

Figure S5a showed that the shell of the TiO<sub>2</sub>/CuO hollow spheres was composed of nanoparticles in a football-like structure. And in Figure S5b, the interplanar distances of 0.336 nm and 0.264 nm were close to the d spacings of the (010) and (110) planes of the monoclinic CuO. The interplanar distances of 0.324 nm and 0.226 nm were agreed well with the lattice spacing of the (110) and (2 0 0) planes of the tetragonal TiO<sub>2</sub> respectively.

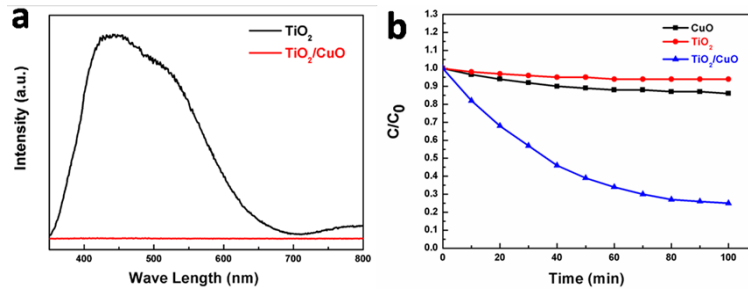

**Figure S6.** (a) is the PL spectra of the TiO<sub>2</sub> hollow spheres and TiO<sub>2</sub>/CuO hybrid nanostructures, respectively. And (b) is the concentration changes of RhB dye as a function of irradiation time under visible light ( $\lambda > 420$  nm) with TiO<sub>2</sub>, CuO hollow spheres and TiO<sub>2</sub>/CuO hybrid nanostructures, respectively.

As a nanoheterojunction between the indirect and direct gap semiconductors, the PL emission of TiO<sub>2</sub>/CuO hybrid nanostructures in Figure S6a exhibited a quenching phenomenon, indicating that the recombination of the photo-generated charge carrier was almost vanished in this system. And in the visible light, the photocatalytic of CuO and TiO<sub>2</sub> hollow spheres were not impressive under visible light (Figure S6b). However a significant degradation of RhB dye was observed in the TiO<sub>2</sub>/CuO nanoheterojunctions under the same light irradiation. As we all known TiO<sub>2</sub> was a wide-gap semiconductor, therefore, the excellent photocatalytic of the TiO<sub>2</sub>/CuO hollow spheres under visible light should be attributed to the formation of TiO<sub>2</sub>/CuO nanoheterojunctions.

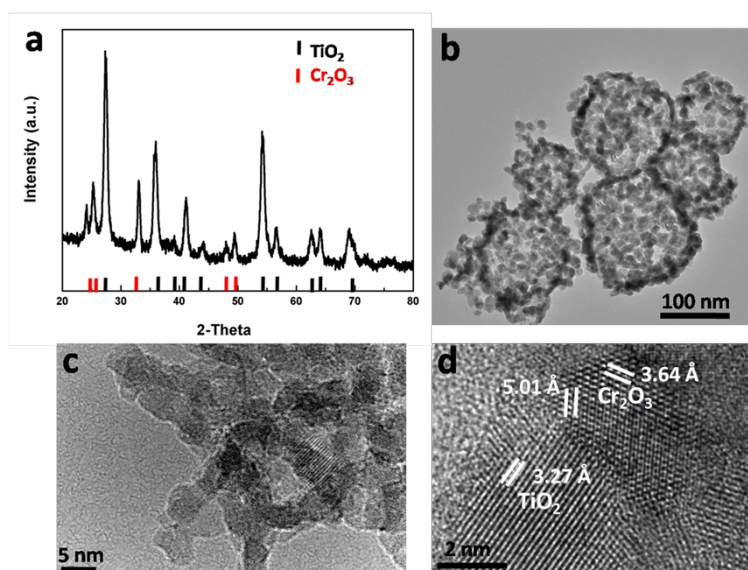

**Figure S7.** (a) and (b) are the XRD pattern and TEM image of the  $\text{TiO}_2/\text{Cr}_2\text{O}_3$  hollow spheres. (c) is the enlarged TEM image of the shell of  $\text{TiO}_2/\text{Cr}_2\text{O}_3$  hollow spheres and (d) is the HRTEM image of the  $\text{TiO}_2/\text{Cr}_2\text{O}_3$  hybrid nanostructures.

The XRD pattern of the  $\text{TiO}_2/\text{Cr}_2\text{O}_3$  hollow spheres in Figure S7a showed the pure  $\text{TiO}_2$  (PDF#65-1119) and  $\text{Cr}_2\text{O}_3$  (PDF#38-1479) diffraction peaks. The typical TEM image of the  $\text{TiO}_2/\text{Cr}_2\text{O}_3$  hollow spheres clearly illustrated the perfect hollow characteristic (Figure S7b). Figure S7c showed that the shell of the  $\text{TiO}_2/\text{Cr}_2\text{O}_3$  hollow spheres was composed of nanoparticles in a map-like structure. And in Figure S7d, the interplanar distances of 0.501 nm and 0.364 nm were close to the d spacings of the (010) and (012) planes of the  $\text{Cr}_2\text{O}_3$ . The interplanar distances of 0.327 nm was agreed with the lattice spacing of the (110) plane of the tetragonal  $\text{TiO}_2$ .
